# Supplementary material for: Garlic essential oil mediates acute and chronic mild stress-induced depression in rats via modulation of monoaminergic neurotransmission and brain-derived neurotrophic factor levels
Source: Royal Society of Chemistry journal article supplement (doi:10.1039/c9fo00601j), 2019-01-01
Supplement: c9fo00601j1.pdf [file c9fo00601j1.pdf]

### Supplementary data

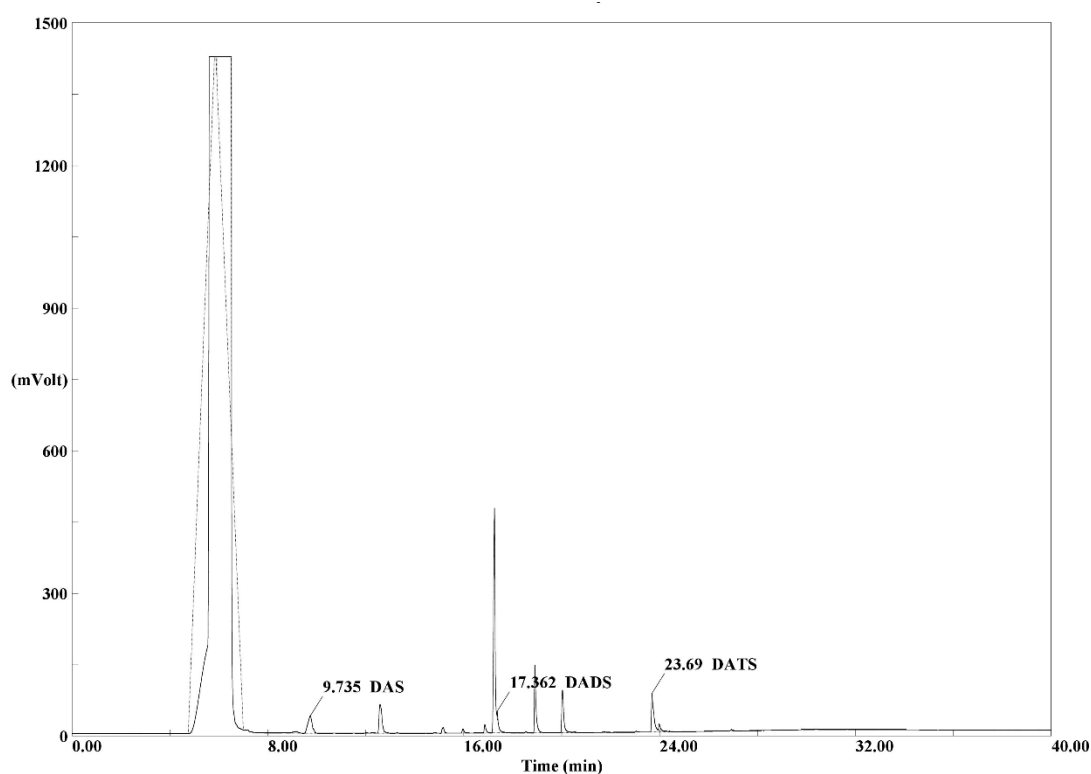

**Supplementary Figure 1.** The components of garlic essential oil (GEO) in different retention time (RT) used gas chromatograph (GC).

The three major components of GEO including DADS (36.9 %), DATS (21%), and DAS (7.9 %) accounted for 65.0% of the total oil.

DAS (diallyl sulfide): 9.73 min

DADS (diallyl disulfide): 17.36 min

DATS (diallyl trisulfide): 23.69 min

**Supplementary Table 1.** The effects of GEO administration on levels of DA, 5-HT, and their metabolites in the frontal cortex and hippocampus of rats in forced swimming test (FST).

| Groups         | 5-HT                        | 5-HIAA                     | DA                        | DOPAC                      | HVA                       |
|----------------|-----------------------------|----------------------------|---------------------------|----------------------------|---------------------------|
|                | ng/g brain tissue           |                            | ng/g brain tissue         |                            |                           |
| Frontal cortex |                             |                            |                           |                            |                           |
| CTL            | 632.7 ± 104.2 <sup>b</sup>  | 1003 ± 504.8 <sup>a</sup>  | 1048 ± 425.1 <sup>b</sup> | 936.8 ± 203.4 <sup>a</sup> | 1815 ± 1417 <sup>a</sup>  |
| GEO 25         | 715.9 ± 128.7 <sup>ab</sup> | 799.7 ± 85.8 <sup>a</sup>  | 2394 ± 712.4 <sup>a</sup> | 742.8 ± 99.3 <sup>ab</sup> | 1083 ± 155.2 <sup>a</sup> |
| GEO 50         | 878.7 ± 235 <sup>a</sup>    | 940.1 ± 159.7 <sup>a</sup> | 2347 ± 1171 <sup>a</sup>  | 730 ± 108.9 <sup>b</sup>   | 1101 ± 164.3 <sup>a</sup> |
| FLU            | 806.5 ± 225.6 <sup>ab</sup> | 799.6 ± 181.5 <sup>a</sup> | 1705 ± 812 <sup>ab</sup>  | 928.6 ± 185.8 <sup>a</sup> | 1276 ± 275.4 <sup>a</sup> |
| Hippocampus    |                             |                            |                           |                            |                           |
| CTL            | 124 ± 77.1 <sup>b</sup>     | 103.5 ± 19.2 <sup>a</sup>  | N.D.                      | N.D.                       | N.D.                      |
| GEO 25         | 217 ± 83.7 <sup>a</sup>     | 115.2 ± 29.2 <sup>a</sup>  | N.D.                      | N.D.                       | N.D.                      |
| GEO 50         | 165.9 ± 20.6 <sup>ab</sup>  | 87.28 ± 24.8 <sup>a</sup>  | N.D.                      | N.D.                       | N.D.                      |
| FLU            | 136.3 ± 23.6 <sup>b</sup>   | 87 ± 7.8 <sup>a</sup>      | N.D.                      | N.D.                       | N.D.                      |

Data are presented as the mean ± SD (n = 6). Statistical analysis was performed using one-way ANOVA with Duncan's multiple-comparison test. Different letters indicate significant differences among groups at the level of  $p < 0.05$ . CTL, control; GEO, garlic essential oil; FLU, fluoxetine 10 mg/kg bw.

**Supplementary Table 2.** The effects of GEO and DADS administration on levels of DA, 5-HT, and their metabolites in the frontal cortex and hippocampus of rats in unpredictable chronic mild stress (UCMS).

| Groups         | 5-HT                         | 5-HIAA                      | DA                         | DOPAC                       | HVA           |
|----------------|------------------------------|-----------------------------|----------------------------|-----------------------------|---------------|
|                | ng/g brain tissue            |                             |                            | ng/g brain tissue           |               |
| Frontal cortex |                              |                             |                            |                             |               |
| CON            | 742 ± 103.7 <sup>b</sup>     | 697.9 ± 101 <sup>a</sup>    | 2131 ± 1380 <sup>b</sup>   | 604.2 ± 171.8 <sup>c</sup>  | 1016 ± 131.7  |
| UCMS           | 422.5 ± 60.1 <sup>c</sup>    | 554.8 ± 248.6 <sup>ab</sup> | 1207 ± 631.6 <sup>b</sup>  | 491.3 ± 61.4 <sup>c</sup>   | N.D.          |
| GEO 25         | 1413 ± 516.3 <sup>a</sup>    | 718.7 ± 375.4 <sup>a</sup>  | 8597 ± 5440 <sup>a</sup>   | 832.5 ± 393 <sup>a</sup>    | 1957 ± 1670   |
| GEO 50         | 924.1 ± 334 <sup>b</sup>     | 697.1 ± 143.9 <sup>ab</sup> | 3466 ± 2636 <sup>b</sup>   | 607.4 ± 108 <sup>b</sup>    | 990.9 ± 468.5 |
| DADS 10        | 715 ± 77.6 <sup>bc</sup>     | 661.4 ± 113.2 <sup>ab</sup> | 1814 ± 973.7 <sup>b</sup>  | 479.4 ± 109.1 <sup>bc</sup> | 945.6 ± 182.7 |
| DADS 20        | 672 ± 208.9 <sup>bc</sup>    | 465.7 ± 118.5 <sup>b</sup>  | 739.1 ± 458.8 <sup>b</sup> | 359.2 ± 73.9 <sup>bc</sup>  | N.D.          |
| FLU            | 717.4 ± 111.4 <sup>bc</sup>  | 454.9 ± 75.5 <sup>b</sup>   | 1543 ± 297.8 <sup>b</sup>  | 555.2 ± 93.8 <sup>bc</sup>  | N.D.          |
| Hippocampus    |                              |                             |                            |                             |               |
| CON            | 404.9 ± 80.21 <sup>a</sup>   | 398.9 ± 105.7 <sup>b</sup>  | N.D.                       | N.D.                        | N.D.          |
| UCMS           | 240.2 ± 56.7 <sup>cd</sup>   | 514.6 ± 103.2 <sup>a</sup>  | N.D.                       | N.D.                        | N.D.          |
| GEO 25         | 281.8 ± 124.1 <sup>bcd</sup> | 340.2 ± 80.7 <sup>b</sup>   | N.D.                       | N.D.                        | N.D.          |
| GEO 50         | 211 ± 147.1 <sup>de</sup>    | 291.5 ± 66.1 <sup>b</sup>   | N.D.                       | N.D.                        | N.D.          |
| DADS 10        | 326.5 ± 87.1 <sup>abc</sup>  | 368.2 ± 131.1 <sup>b</sup>  | N.D.                       | N.D.                        | N.D.          |
| DADS 20        | 358 ± 72.4 <sup>ab</sup>     | 290.7 ± 47.2 <sup>b</sup>   | N.D.                       | N.D.                        | N.D.          |
| FLU            | 124.4 ± 82.9 <sup>e</sup>    | 338.1 ± 143.9 <sup>b</sup>  | N.D.                       | N.D.                        | N.D.          |

Data are presented as the mean ± SD (n = 7). Statistical analysis was performed using one-way ANOVA with Duncan's multiple-comparison test. Different letters indicate significant differences among groups at the level of  $p < 0.05$ . UCMS, unpredictable chronic mild stress; CON, control; GEO, garlic essential oil; DADS, diallyl disulfide;

FLU, fluoxetine 10 mg/kg bw.
